# Supplementary material for: Molecular Mechanisms Associated with the Development of the Metritis Complex in Dairy Cattle
Source: MDPI journal article supplement (doi:10.3390/genes15040439), 2024-03-30
Supplement: s1 [file s1]

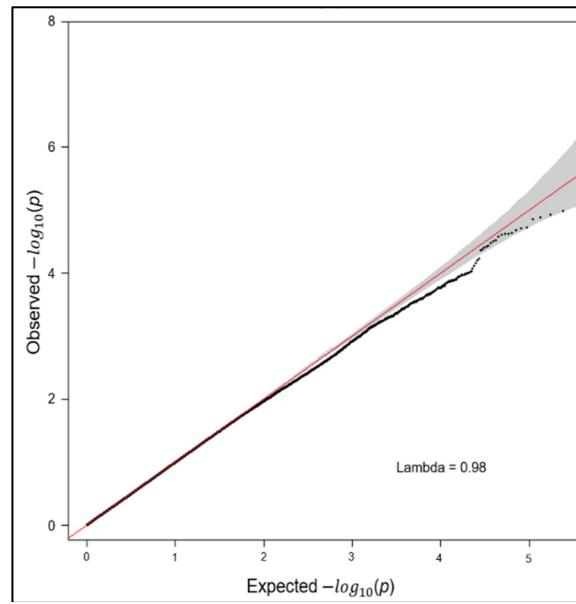

Figure S1. Quantile-Quantile (QQ) plot of the expected vs. the observed null distribution of the P-values for the association between the 624,460 SNPs and 1,967 dairy cattle across three herds diagnosed with at least one disease in the metritis complex.

**Table S1. Identified single nucleotide polymorphisms (SNPs) with flanking candidate genes and associated quantitative trait loci (QTL).**

| BTA <sup>1</sup> | SNP-ID <sup>2</sup> | P-value <sup>3</sup> | SNP<br>Position** | Candidate<br>gene <sup>4</sup> | Linked<br>Trait <sup>5</sup> | QTL ID       |
|------------------|---------------------|----------------------|-------------------|--------------------------------|------------------------------|--------------|
| 12               | BovineHD1200009956  | 3.30E-06             | 33569134          | ATP8A2                         | Non-return<br>rate           | QTL:5010     |
| 10               | BovineHD1000023339  | 2.36E-05             | 81497245          | SRSF5                          | Dystocia                     | QTL:11353    |
| 10               | BovineHD1000023340  | 2.36E-05             | 81497728          | SRSF5                          | Dystocia                     | QTL:11353    |
| 10               | BTB-02098111        | 3.03E-05             | 81532849          | SLC10A1                        | Dystocia                     | QTL:11444    |
| 10               | BovineHD1000023344  | 3.05E-05             | 81512830          | SLC10A1                        | Dystocia                     | QTL:11444    |
| 10               | BovineHD1000023769  | 3.31E-05             | 83080675          | SIPA1L1                        | Stillbirth                   | QTL:11445    |
| 10               | BTA-77307-no-rs     | 3.96E-05             | 81502058          | SRSF5                          | Dystocia                     | QTL:11353    |
| 17               | BovineHD1700021176  | 4.33E-05             | 70481417          | DEPDC5                         | Non-return<br>rate           | QTL:141715   |
| 10               | BovineHD1000023497  | 5.78E-05             | 82066559          | COX16                          | Stillbirth                   | QTL:11445    |
| 15               | BovineHD1500002327  | 7.55E-05             | 8809053           | CNTN5                          | Non-return<br>rate           | QTL:3571     |
| 11               | BovineHD0500026389  | 8.59E-05             | 92476148          | DAB2IP                         | Stillbirth                   | QTL:126867   |
| 10               | BovineHD1000025233  | 9.64E-05             | 87632404          | ESRRB                          | Placental<br>Retention       | QTL:11316    |
| 21               | BovineHD2100020220  | 1.03E-04             | 67602910          | TRAF3<br>AMN                   | ____<br>____                 | ____<br>____ |
| 8                | BovineHD0800007389  | 1.05E-04             | 24598682          | SLC24A2                        | Stillbirth                   | QTL:11443    |
| 10               | BovineHD1000025221  | 1.13E-04             | 87619311          | ESRRB                          | Placental<br>Retention       | QTL:11316    |
| 10               | BovineHD1000023418  | 1.15E-04             | 81811346          | SLC8A3                         | Dystocia                     | QTL:11353    |
| 10               | BovineHD1000025236  | 1.27E-04             | 87637414          | ESRRB                          | Placental<br>Retention       | QTL:11316    |
| 10               | BovineHD1000025235  | 1.27E-04             | 87634538          | ESRRB                          | Placental<br>Retention       | QTL:11316    |
| 11               | BovineHD1100026876  | 1.28E-04             | 92476478          | DAB2IP                         | Stillbirth                   | QTL:126867   |

<sup>1</sup> BTA =Bos taurus autosome

<sup>2</sup> SNP = Single nucleotide polymorphism; SNPs listed in ascending order with respect to P-value

<sup>3</sup> Genome-wide significance threshold

<sup>4</sup> Nearest gene 10k base pair downstream/upstream relative to the SNP

<sup>5</sup> Previously associated trait; Details obtained from the Animal QTLdb for cattle [36]

|    |                    |          |          |                 |                     |            |
|----|--------------------|----------|----------|-----------------|---------------------|------------|
| 27 | BovineHD2700007980 | 1.31E-04 | 29252315 | <i>RNF122</i>   | Dystocia            | QTL:11393  |
| 17 | BovineHD1700019549 | 1.33E-04 | 65237605 | <i>KIAA1671</i> | Calving ease        | QTL:11051  |
| 11 | BovineHD1100026874 | 1.33E-04 | 92473780 | <i>DAB2IP</i>   | Stillbirth          | QTL:126867 |
| 11 | BovineHD1100026881 | 1.37E-04 | 92481234 | <i>DAB2IP</i>   | Stillbirth          | QTL:126867 |
| 10 | BovineHD1000025230 | 1.39E-04 | 87629150 | <i>ESRRB</i>    | Placental Retention | QTL:11316  |
| 11 | BovineHD1100026880 | 1.59E-04 | 92480213 | <i>DAB2IP</i>   | Stillbirth          | QTL:126867 |
| 4  | BovineHD0400018341 | 1.71E-04 | 66416290 | <i>SCRN1</i>    | Calving Ease        | QTL:10713  |
|    |                    |          |          | <i>WIPF3</i>    | Calving Ease        | QTL:10713  |
| 10 | BovineHD1000025232 | 1.73E-04 | 87631188 | <i>ESRRB</i>    | Placental Retention | QTL:11316  |
| 10 | BovineHD1000025229 | 1.73E-04 | 87628421 | <i>ESRRB</i>    | Placental Retention | QTL:11316  |
| 10 | BovineHD1000025231 | 1.75E-04 | 87630598 | <i>ESRRB</i>    | Placental Retention | QTL:11316  |
| 8  | BovineHD0800007387 | 1.76E-04 | 24596562 | <i>SLC24A2</i>  | Stillbirth          | QTL:11443  |
| 11 | BovineHD1100026875 | 1.86E-04 | 92475887 | <i>DAB2IP</i>   | Stillbirth          | QTL:126867 |
| 11 | BovineHD1100026877 | 1.95E-04 | 92477673 | <i>DAB2IP</i>   | Stillbirth          | QTL:126867 |
| 10 | BovineHD1000025228 | 2.09E-04 | 87627458 | <i>ESRRB</i>    | Placental Retention | QTL:11316  |
| 10 | BovineHD1000023822 | 2.15E-04 | 83245103 | <i>SIPA1L1</i>  | Stillbirth          | QTL:11445  |
| 25 | BovineHD2500009545 | 2.20E-04 | 34170987 | <i>POR</i>      | Calving ease        | QTL:4674   |
| 8  | BovineHD0800007390 | 2.26E-04 | 24599571 | <i>SLC24A2</i>  | Stillbirth          | QTL:11443  |
| 11 | BovineHD1100005785 | 2.38E-04 | 18909925 | <i>CRIM1</i>    | -                   | -          |
| 10 | BovineHD1000025245 | 2.44E-04 | 87650109 | <i>ESRRB</i>    | Placental Retention | QTL:11316  |
| 18 | BovineHD1800003585 | 2.47E-04 | 10026821 | <i>CDH13</i>    | Dystocia            | QTL:2707   |

**Table S2. Enriched gene ontology (GO) biological process (BP) terms for the metritis complex in Jersey and Holstein dairy cattle.**

| GO-ID <sup>6</sup> | Term                                                                 | p-value | Gene(s) Assoc. <sup>7</sup> |
|--------------------|----------------------------------------------------------------------|---------|-----------------------------|
| GO:0098703         | Calcium Ion Import Across Plasma Membrane                            | 0.015   | <i>SLC8A3, SLC24A2</i>      |
| GO:0032088         | Negative Regulation of NF-KappaB Transcription Factor Activity       | 0.062   | <i>DAB2IP, TRAF3</i>        |
| GO:0043087         | Regulation of GTPase Activity                                        | 0.065   | <i>DAB2IP, SIPA1L1</i>      |
| GO:0046330         | Positive Regulation of JNK Cascade                                   | 0.076   | <i>DAB2IP, TRAF3</i>        |
| GO:0043065         | Positive Regulation of Apoptotic Process                             | 0.184   | <i>DAB2IP, RNF122</i>       |
| GO:0008285         | Negative Regulation of Cell Proliferation                            | 0.214   | <i>CDH13, DAB2IP</i>        |
| GO:0045944         | Positive Regulation of Transcription from RNA Polymerase II Promoter | 0.510   | <i>CDH13, DAB2IP</i>        |
| GO:1900744         | Regulation of P38Mapk Cascade                                        | 1.000   | <i>DAB2IP</i>               |
| GO:0070317         | Negative Regulation of G0 to G1 Transition                           | 1.000   | <i>DAB2IP</i>               |
| GO:0030032         | Lamellipodium Assembly                                               | 1.000   | <i>CDH13</i>                |
| GO:0048661         | Positive Regulation of Smooth Muscle Cell Proliferation              | 1.000   | <i>CDH13</i>                |
| GO:0050680         | Negative Regulation of Epithelial Cell Proliferation                 | 1.000   | <i>DAB2IP</i>               |
| GO:0043124         | Negative Regulation of I-KappaB Kinase/NF-KappaB Signaling           | 1.000   | <i>DAB2IP</i>               |
| GO:0007162         | Negative Regulation of Cell Adhesion                                 | 1.000   | <i>CDH13</i>                |
| GO:0043542         | Endothelial Cell Migration                                           | 1.000   | <i>CDH13</i>                |
| GO:0014067         | Negative Regulation of Phosphatidylinositol 3-Kinase Signaling       | 1.000   | <i>DAB2IP</i>               |
| GO:0070588         | Calcium Ion Transmembrane Transport                                  | 1.000   | <i>SLC24A2</i>              |

<sup>6</sup> GO-ID = Gene Ontology Identification Number

<sup>7</sup> Gene(s) Assoc. = Genes linked to significant genetic variants in the metritis complex GWAS *in-silico* functional analysis

|            |                                                                        |       |         |
|------------|------------------------------------------------------------------------|-------|---------|
| GO:0030335 | Positive Regulation of Cell Migration                                  | 1.000 | CDH13   |
| GO:0010917 | Negative Regulation of Mitochondrial Membrane Potential                | 1.000 | RNF122  |
| GO:0007156 | Homophilic Cell Adhesion Via Plasma Membrane Adhesion Molecules        | 1.000 | CDH13   |
| GO:0051865 | Protein Autoubiquitination                                             | 1.000 | RNF122  |
| GO:0090346 | Cellular Organofluorine Metabolic Process                              | 1.000 | POR     |
| GO:0036324 | Vascular Endothelial Growth Factor Receptor-2 Signaling Pathway        | 1.000 | DAB2IP  |
| GO:0050688 | Regulation of Defense Response to Virus                                | 1.000 | TRAF3   |
| GO:0070534 | Protein K63-Linked Ubiquitination                                      | 1.000 | TRAF3   |
| GO:0034260 | Negative Regulation of GTPase Activity                                 | 1.000 | DAB2IP  |
| GO:0007588 | Excretion                                                              | 1.000 | AMN     |
| GO:0034198 | Cellular Response to Amino Acid Starvation                             | 1.000 | DEPDC5  |
| GO:0007613 | Memory                                                                 | 1.000 | SLC24A2 |
| GO:0043161 | Proteasome-Mediated Ubiquitin-Dependent Protein Catabolic Process      | 1.000 | RNF122  |
| GO:0048814 | Regulation of Dendrite Morphogenesis                                   | 1.000 | SIPA1L1 |
| GO:0015914 | Phospholipid Transport                                                 | 1.000 | ATP8A2  |
| GO:0050927 | Positive Regulation of Positive Chemotaxis                             | 1.000 | CDH13   |
| GO:0000122 | Negative Regulation of Transcription from RNA Polymerase II Promoter   | 1.000 | DAB2IP  |
| GO:0050770 | Regulation of Axonogenesis                                             | 1.000 | SIPA1L1 |
| GO:0060292 | Long Term Synaptic Depression                                          | 1.000 | SLC24A2 |
| GO:0043122 | Regulation of I-KappaB Kinase/NF-KappaB Signaling                      | 1.000 | TRAF3   |
| GO:0045332 | Phospholipid Translocation                                             | 1.000 | ATP8A2  |
| GO:0007601 | Visual Perception                                                      | 1.000 | SLC24A2 |
| GO:0021814 | Cell Motility Involved in Cerebral Cortex Radial Glia Guided Migration | 1.000 | DAB2IP  |

|            |                                                                                      |       |         |
|------------|--------------------------------------------------------------------------------------|-------|---------|
| GO:0008625 | Extrinsic Apoptotic Signaling Pathway Via Death Domain Receptors                     | 1.000 | DAB2IP  |
| GO:1900006 | Positive Regulation of Dendrite Development                                          | 1.000 | DAB2IP  |
| GO:0035556 | Intracellular Signal Transduction                                                    | 1.000 | DEPDC5  |
| GO:0030514 | Negative Regulation of Bmp Signaling Pathway                                         | 1.000 | CRIM1   |
| GO:0030048 | Actin Filament-Based Movement                                                        | 1.000 | WIPF3   |
| GO:0090630 | Activation of GTPase Activity                                                        | 1.000 | SIPA1L1 |
| GO:0035148 | Tube Formation                                                                       | 1.000 | DAB2IP  |
| GO:0030948 | Negative Regulation of Vascular Endothelial Growth Factor Receptor Signaling Pathway | 1.000 | DAB2IP  |
| GO:0030001 | Metal Ion Transport                                                                  | 1.000 | SLC8A3  |
| GO:0051056 | Regulation of Small GTPase Mediated Signal Transduction                              | 1.000 | SIPA1L1 |
| GO:0006357 | Regulation of Transcription from RNA Polymerase II Promoter                          | 1.000 | ESRRB   |
| GO:0098742 | Cell-Cell Adhesion Via Plasma-Membrane Adhesion Molecules                            | 1.000 | CDH13   |
| GO:0010506 | Regulation of Autophagy                                                              | 1.000 | DEPDC5  |
| GO:0016339 | Calcium-Dependent Cell-Cell Adhesion Via Plasma Membrane Cell Adhesion Molecules     | 1.000 | CDH13   |
| GO:0045668 | Negative Regulation of Osteoblast Differentiation                                    | 1.000 | CRIM1   |
| GO:0048147 | Negative Regulation of Fibroblast Proliferation                                      | 1.000 | DAB2IP  |
| GO:0043616 | Keratinocyte Proliferation                                                           | 1.000 | CDH13   |
| GO:0010596 | Negative Regulation of Endothelial Cell Migration                                    | 1.000 | DAB2IP  |
| GO:0000398 | MRNA Splicing, Via Spliceosome                                                       | 1.000 | SRSF5   |
| GO:0043407 | Negative Regulation of Map Kinase Activity                                           | 1.000 | DAB2IP  |
| GO:0070373 | Negative Regulation of Erk1 and Erk2 Cascade                                         | 1.000 | DAB2IP  |
| GO:2001224 | Positive Regulation of Neuron Migration                                              | 1.000 | DAB2IP  |
| GO:0007154 | Cell Communication                                                                   | 1.000 | SLC8A3  |

|            |                                                               |       |                |
|------------|---------------------------------------------------------------|-------|----------------|
| GO:0048013 | Ephrin Receptor Signaling Pathway                             | 1.000 | <i>SIPA1L1</i> |
| GO:0030162 | Regulation of Proteolysis                                     | 1.000 | <i>TRAF3</i>   |
| GO:0044257 | Cellular Protein Catabolic Process                            | 1.000 | <i>DAB2IP</i>  |
| GO:0090129 | Positive Regulation of Synapse Maturation                     | 1.000 | <i>DAB2IP</i>  |
| GO:0021819 | Layer Formation in Cerebral Cortex                            | 1.000 | <i>DAB2IP</i>  |
| GO:0001817 | Regulation of Cytokine Production                             | 1.000 | <i>TRAF3</i>   |
| GO:0060291 | Long-Term Synaptic Potentiation                               | 1.000 | <i>SLC24A2</i> |
| GO:0048666 | Neuron Development                                            | 1.000 | <i>ATP8A2</i>  |
| GO:0030100 | Regulation of Endocytosis                                     | 1.000 | <i>CDH13</i>   |
| GO:0031532 | Actin Cytoskeleton Reorganization                             | 1.000 | <i>SIPA1L1</i> |
| GO:0038026 | Reelin-Mediated Signaling Pathway                             | 1.000 | <i>DAB2IP</i>  |
| GO:0007266 | Rho Protein Signal Transduction                               | 1.000 | <i>CDH13</i>   |
| GO:0031334 | Positive Regulation of Protein Complex Assembly               | 1.000 | <i>DAB2IP</i>  |
| GO:0008063 | Toll Signaling Pathway                                        | 1.000 | <i>TRAF3</i>   |
| GO:0032770 | Positive Regulation of Monooxygenase Activity                 | 1.000 | <i>POR</i>     |
| GO:0007252 | I-KappaB Phosphorylation                                      | 1.000 | <i>DAB2IP</i>  |
| GO:1901800 | Positive Regulation of Proteasomal Protein Catabolic Process  | 1.000 | <i>DAB2IP</i>  |
| GO:0043553 | Negative Regulation of Phosphatidylinositol 3-Kinase Activity | 1.000 | <i>DAB2IP</i>  |
| GO:0045087 | Innate Immune Response                                        | 1.000 | <i>TRAF3</i>   |
| GO:0002224 | Toll-Like Receptor Signaling Pathway                          | 1.000 | <i>TRAF3</i>   |
| GO:0016525 | Negative Regulation of Angiogenesis                           | 1.000 | <i>DAB2IP</i>  |
| GO:0071222 | Cellular Response to Lipopolysaccharide                       | 1.000 | <i>DAB2IP</i>  |
| GO:0009725 | Response to Hormone                                           | 1.000 | <i>POR</i>     |
| GO:0033617 | Mitochondrial Respiratory Chain Complex Iv Assembly           | 1.000 | <i>COX16</i>   |
| GO:0006508 | Proteolysis                                                   | 1.000 | <i>SCRN1</i>   |
| GO:0034144 | Negative Regulation of Toll-Like Receptor 4 Signaling Path-   | 1.000 | <i>DAB2IP</i>  |

| way        |                                                                                        |       |         |
|------------|----------------------------------------------------------------------------------------|-------|---------|
| GO:1903363 | Negative Regulation of Cellular Protein Catabolic Process                              | 1.000 | DAB2IP  |
| GO:0006874 | Cellular Calcium Ion Homeostasis                                                       | 1.000 | SLC24A2 |
| GO:0006887 | Exocytosis                                                                             | 1.000 | SCRN1   |
| GO:0090090 | Negative Regulation of Canonical WNT Signaling Pathway                                 | 1.000 | DAB2IP  |
| GO:0001954 | Positive Regulation of Cell-Matrix Adhesion                                            | 1.000 | CDH13   |
| GO:0033209 | Tumor Necrosis Factor-Mediated Signaling Pathway                                       | 1.000 | TRAF3   |
| GO:0032007 | Negative Regulation of Tor Signaling                                                   | 1.000 | DEPDC5  |
| GO:0015889 | Cobalamin Transport                                                                    | 1.000 | AMN     |
| GO:0035924 | Cellular Response to Vascular Endothelial Growth Factor<br>Stimulus                    | 1.000 | DAB2IP  |
| GO:0055096 | Low-Density Lipoprotein Particle Mediated Signaling                                    | 1.000 | CDH13   |
| GO:0070059 | Intrinsic Apoptotic Signaling Pathway in Response to Endo-<br>plasmic Reticulum Stress | 1.000 | DAB2IP  |
| GO:0015721 | Bile Acid and Bile Salt Transport                                                      | 1.000 | SLC10A1 |
| GO:0050850 | Positive Regulation of Calcium-Mediated Signaling                                      | 1.000 | CDH13   |
| GO:0051668 | Localization Within Membrane                                                           | 1.000 | CDH13   |
| GO:0043507 | Positive Regulation of Jun Kinase Activity                                             | 1.000 | DAB2IP  |
| GO:0001938 | Positive Regulation of Endothelial Cell Proliferation                                  | 1.000 | CDH13   |
| GO:0006898 | Receptor-Mediated Endocytosis                                                          | 1.000 | AMN     |
| GO:0007612 | Learning                                                                               | 1.000 | SLC24A2 |
| GO:0043001 | Golgi to Plasma Membrane Protein Transport                                             | 1.000 | AMN     |
| GO:0022900 | Electron Transport Chain                                                               | 1.000 | POR     |
| GO:0008104 | Protein Localization                                                                   | 1.000 | AMN     |
| GO:0071347 | Cellular Response to Interleukin-1                                                     | 1.000 | DAB2IP  |
| GO:2001235 | Positive Regulation of Apoptotic Signaling Pathway                                     | 1.000 | DAB2IP  |
| GO:0032648 | Regulation of Interferon-Beta Production                                               | 1.000 | TRAF3   |



|                   |                                                                                |       |               |
|-------------------|--------------------------------------------------------------------------------|-------|---------------|
| <b>GO:0042981</b> | Regulation of Apoptotic Process                                                | 1.000 | <i>TRAF3</i>  |
| <b>GO:0015031</b> | Protein Transport                                                              | 1.000 | <i>AMN</i>    |
| <b>GO:0035725</b> | Sodium Ion Transmembrane Transport                                             | 1.000 | <i>SLC8A3</i> |
| <b>GO:0010719</b> | Negative Regulation of Epithelial to Mesenchymal Transition                    | 1.000 | <i>DAB2IP</i> |
| <b>GO:0002040</b> | Sprouting Angiogenesis                                                         | 1.000 | <i>CDH13</i>  |
| <b>GO:0016601</b> | RAC Protein Signal Transduction                                                | 1.000 | <i>CDH13</i>  |
| <b>GO:0048812</b> | Neuron Projection Morphogenesis                                                | 1.000 | <i>DAB2IP</i> |
| <b>GO:0042058</b> | Regulation of Epidermal Growth Factor Receptor Signaling<br>Pathway            | 1.000 | <i>CDH13</i>  |
| <b>GO:0071356</b> | Cellular Response to Tumor Necrosis Factor                                     | 1.000 | <i>DAB2IP</i> |
| <b>GO:1900747</b> | Negative Regulation of Vascular Endothelial Growth Factor<br>Signaling Pathway | 1.000 | <i>DAB2IP</i> |

**Table S3. Enriched gene ontology (GO) cellular component (CC) terms for the metritis complex in Jersey and Holstein dairy cattle.**

| GO-ID <sup>8</sup> | Term                                               | p-value | Gene(s) Assoc. <sup>9</sup>                                    |
|--------------------|----------------------------------------------------|---------|----------------------------------------------------------------|
| GO:0030139         | Endocytic Vesicle                                  | 0.035   | <i>DAB2IP, AMN</i>                                             |
| GO:0005737         | Cytoplasm                                          | 0.203   | <i>CDH13, DEPDC5, RNF122, SIPA1L1, SCRNI, TRAF3</i>            |
| GO:0016021         | Integral Component of Membrane                     | 0.343   | <i>COX16, ATP8A2, POR, RNF122, CRIM1, SLC10A1, AMN, SLC8A3</i> |
| GO:0005887         | Integral Component of Plasma Membrane              | 0.529   | <i>SLC8A3, SLC24A2</i>                                         |
| GO:0005886         | Plasma Membrane                                    | 0.645   | <i>ATP8A2, CDH13, SIPA1L1, AMN, SLC8A3</i>                     |
| GO:0005615         | Extracellular Space                                | 0.690   | <i>CDH13, AMN</i>                                              |
| GO:0005829         | Cytosol                                            | 0.925   | <i>SRSF5, POR</i>                                              |
| GO:0005634         | Nucleus                                            | 1.000   | <i>ESRRB</i>                                                   |
| GO:0009897         | External Side of Plasma Membrane                   | 1.000   | <i>CDH13</i>                                                   |
| GO:0043005         | Neuron Projection                                  | 1.000   | <i>CDH13</i>                                                   |
| GO:1990032         | Parallel Fiber                                     | 1.000   | <i>DAB2IP</i>                                                  |
| GO:0031965         | Nuclear Membrane                                   | 1.000   | <i>SCRNI</i>                                                   |
| GO:0005884         | Actin Filament                                     | 1.000   | <i>WIPF3</i>                                                   |
| GO:0005730         | Nucleolus                                          | 1.000   | <i>SRSF5</i>                                                   |
| GO:0005901         | Caveola                                            | 1.000   | <i>CDH13</i>                                                   |
| GO:0010008         | Endosome Membrane                                  | 1.000   | <i>ATP8A2</i>                                                  |
| GO:0042383         | Sarcolemma                                         | 1.000   | <i>SLC8A3</i>                                                  |
| GO:0098794         | Post synapse                                       | 1.000   | <i>SLC8A3</i>                                                  |
| GO:0097381         | Photoreceptor Disc Membrane                        | 1.000   | <i>ATP8A2</i>                                                  |
| GO:0032809         | Neuronal Cell Body Membrane                        | 1.000   | <i>DAB2IP</i>                                                  |
| GO:0012505         | Endomembrane System                                | 1.000   | <i>RNF122</i>                                                  |
| GO:0035631         | Cd40 Receptor Complex                              | 1.000   | <i>TRAF3</i>                                                   |
| GO:0015629         | Actin Cytoskeleton                                 | 1.000   | <i>SIPA1L1</i>                                                 |
| GO:0031305         | Integral Component of Mitochondrial Inner Membrane | 1.000   | <i>COX16</i>                                                   |

<sup>8</sup>GO-ID = Gene Ontology Identification Number

<sup>9</sup>Gene(s) Assoc. = Genes linked to significant genetic variants in the metritis complex GWAS in-silico functional analysis

|            |                                     |       |               |
|------------|-------------------------------------|-------|---------------|
| GO:0031225 | Anchored Component of Membrane      | 1.000 | <i>CDH13</i>  |
| GO:0005789 | Endoplasmic Reticulum Membrane      | 1.000 | <i>POR</i>    |
| GO:0016342 | Catenin Complex                     | 1.000 | <i>CDH13</i>  |
| GO:0044301 | Climbing Fiber                      | 1.000 | <i>DAB2IP</i> |
| GO:0043235 | Receptor Complex                    | 1.000 | <i>AMN</i>    |
| GO:0016020 | Membrane                            | 1.000 | <i>SLC8A3</i> |
| GO:0005743 | Mitochondrial Inner Membrane        | 1.000 | <i>COX16</i>  |
| GO:1990597 | Aip1-Ire1 Complex                   | 1.000 | <i>DAB2IP</i> |
| GO:0030424 | Axon                                | 1.000 | <i>SLC8A3</i> |
| GO:0005765 | Lysosomal Membrane                  | 1.000 | <i>DEPDC5</i> |
| GO:0016324 | Apical Plasma Membrane              | 1.000 | <i>AMN</i>    |
| GO:0009898 | Cytoplasmic Side of Plasma Membrane | 1.000 | <i>TRAF3</i>  |
| GO:0005794 | Golgi Apparatus                     | 1.000 | <i>ATP8A2</i> |
| GO:0001917 | Photoreceptor Inner Segment         | 1.000 | <i>ATP8A2</i> |
| GO:1990531 | Lem3P-Dnf1P Complex                 | 1.000 | <i>ATP8A2</i> |
| GO:0016607 | Nuclear Speck                       | 1.000 | <i>SRSF5</i>  |
| GO:1990130 | Iml1 Complex                        | 1.000 | <i>DEPDC5</i> |
| GO:0044300 | Cerebellar Mossy Fiber              | 1.000 | <i>DAB2IP</i> |
| GO:0000139 | Golgi Membrane                      | 1.000 | <i>ATP8A2</i> |
| GO:0005768 | Endosome                            | 1.000 | <i>ATP8A2</i> |
| GO:0005576 | Extracellular Region                | 1.000 | <i>CRIM1</i>  |
| GO:0005654 | Nucleoplasm                         | 1.000 | <i>ATP8A2</i> |
| GO:0048471 | Perinuclear Region of Cytoplasm     | 1.000 | <i>SLC8A3</i> |

**Table S4. Enriched gene ontology (GO) molecular function (MF) terms for the metritis complex in Jersey and Holstein dairy cattle.**

| GO-ID <sup>10</sup> | Term                                                                                            | P-value | Gene(s) Assoc. <sup>11</sup>   |
|---------------------|-------------------------------------------------------------------------------------------------|---------|--------------------------------|
| GO:0005096          | GTPase Activator Activity                                                                       | 0.011   | <i>DAB2IP, DEPDC5, SIPA1L1</i> |
| GO:0042803          | Protein Homodimerization Activity                                                               | 0.384   | <i>CDH13, DAB2IP</i>           |
| GO:0008270          | Zinc Ion Binding                                                                                | 0.450   | <i>ESRRB, TRAF3</i>            |
| GO:0046872          | Metal Ion Binding                                                                               | 0.749   | <i>RNF122, SLC8A3</i>          |
| GO:0031625          | Ubiquitin Protein Ligase Binding                                                                | 1.000   | <i>TRAF3</i>                   |
| GO:0015491          | Cation: Cation Antiporter Activity                                                              | 1.000   | <i>SLC8A3</i>                  |
| GO:0004879          | RNA Polymerase II Transcription Factor Activity, Ligand-Activated Sequence-Specific DNA Binding | 1.000   | <i>ESRRB</i>                   |
| GO:0042802          | Identical Protein Binding                                                                       | 1.000   | <i>TRAF3</i>                   |
| GO:0005524          | ATP Binding                                                                                     | 1.000   | <i>ATP8A2</i>                  |
| GO:0019901          | Protein Kinase Binding                                                                          | 1.000   | <i>TRAF3</i>                   |
| GO:0003729          | MRNA Binding                                                                                    | 1.000   | <i>SRSF5</i>                   |
| GO:0005102          | Receptor Binding                                                                                | 1.000   | <i>AMN</i>                     |
| GO:0045296          | Cadherin Binding                                                                                | 1.000   | <i>CDH13</i>                   |
| GO:0090555          | Phosphatidylethanolamine-Translocating ATPase Activity                                          | 1.000   | <i>ATP8A2</i>                  |
| GO:0008273          | Calcium, Potassium: Sodium Antiporter Activity                                                  | 1.000   | <i>SLC24A2</i>                 |
| GO:0005516          | Calmodulin Binding                                                                              | 1.000   | <i>SLC8A3</i>                  |
| GO:0000978          | RNA Polymerase II Core Promoter Proximal Region Sequence-Specific DNA Binding                   | 1.000   | <i>ESRRB</i>                   |
| GO:0005262          | Calcium Channel Activity                                                                        | 1.000   | <i>SLC24A2</i>                 |
| GO:0003723          | RNA Binding                                                                                     | 1.000   | <i>SRSF5</i>                   |
| GO:0043539          | Protein Serine/Threonine Kinase Activator Activity                                              | 1.000   | <i>DAB2IP</i>                  |
| GO:0031996          | Thioesterase Binding                                                                            | 1.000   | <i>TRAF3</i>                   |
| GO:0003707          | Steroid Hormone Receptor Activity                                                               | 1.000   | <i>ESRRB</i>                   |
| GO:0051721          | Protein Phosphatase 2A Binding                                                                  | 1.000   | <i>DAB2IP</i>                  |
| GO:0035591          | Signaling Adaptor Activity                                                                      | 1.000   | <i>DAB2IP</i>                  |

<sup>10</sup>GO-ID = Gene Ontology Identification Number

<sup>11</sup>Gene(s) Assoc. = Genes linked to significant genetic variants in the metritis complex GWAS in-silico functional analysis

|            |                                                              |       |         |
|------------|--------------------------------------------------------------|-------|---------|
| GO:0000287 | Magnesium Ion Binding                                        | 1.000 | ATP8A2  |
| GO:0090556 | Phosphatidylserine-Translocating ATPase Activity             | 1.000 | ATP8A2  |
| GO:0016887 | ATPase Activity                                              | 1.000 | ATP8A2  |
| GO:0005496 | Steroid Binding                                              | 1.000 | ESRRB   |
| GO:0019903 | Protein Phosphatase Binding                                  | 1.000 | TRAF3   |
| GO:0050661 | NADP Binding                                                 | 1.000 | POR     |
| GO:0017124 | Sh3 Domain Binding                                           | 1.000 | DAB2IP  |
| GO:0008508 | Bile Acid: Sodium Symporter Activity                         | 1.000 | SLC10A1 |
| GO:0031435 | Mitogen-Activated Protein Kinase Kinase Kinase Binding       | 1.000 | DAB2IP  |
| GO:0070004 | Cysteine-Type Exopeptidase Activity                          | 1.000 | SCRN1   |
| GO:0032266 | Phosphatidylinositol-3-Phosphate Binding                     | 1.000 | DAB2IP  |
| GO:0003958 | NADPH-Hemoprotein Reductase Activity                         | 1.000 | POR     |
| GO:0005164 | Tumor Necrosis Factor Receptor Binding                       | 1.000 | TRAF3   |
| GO:0043565 | Sequence-Specific DNA Binding                                | 1.000 | ESRRB   |
| GO:0070273 | Phosphatidylinositol-4-Phosphate Binding                     | 1.000 | DAB2IP  |
| GO:0050660 | Flavin Adenine Dinucleotide Binding                          | 1.000 | POR     |
| GO:0030169 | Low-Density Lipoprotein Particle Binding                     | 1.000 | CDH13   |
| GO:0003700 | Transcription Factor Activity, Sequence-Specific DNA Binding | 1.000 | ESRRB   |
| GO:0016805 | Dipeptidase Activity                                         | 1.000 | SCRN1   |
| GO:0071889 | 14-3-3 Protein Binding                                       | 1.000 | DAB2IP  |
| GO:0031434 | Mitogen-Activated Protein Kinase Kinase Binding              | 1.000 | DAB2IP  |
| GO:0046875 | Ephrin Receptor Binding                                      | 1.000 | SIPA1L1 |
| GO:0030165 | PDZ Domain Binding                                           | 1.000 | CRIM1   |
| GO:0005123 | Death Receptor Binding                                       | 1.000 | DAB2IP  |
| GO:0010181 | FMN Binding                                                  | 1.000 | POR     |
| GO:0005520 | Insulin-Like Growth Factor Binding                           | 1.000 | CRIM1   |
| GO:0043184 | Vascular Endothelial Growth Factor Receptor 2 Binding        | 1.000 | DAB2IP  |
| GO:0004867 | Serine-Type Endopeptidase Inhibitor Activity                 | 1.000 | CRIM1   |
| GO:0044877 | Macromolecular Complex Binding                               | 1.000 | DAB2IP  |
| GO:0005432 | Calcium: Sodium Antiporter Activity                          | 1.000 | SLC8A3  |
| GO:0005509 | Calcium Ion Binding                                          | 1.000 | CDH13   |
| GO:0016491 | Oxidoreductase Activity                                      | 1.000 | POR     |

|            |                                                          |       |               |
|------------|----------------------------------------------------------|-------|---------------|
| GO:0036312 | Phosphatidylinositol 3-Kinase Regulatory Subunit Binding | 1.000 | <i>DAB2IP</i> |
| GO:0055100 | Adiponectin Binding                                      | 1.000 | <i>CDH13</i>  |
| GO:0061630 | Ubiquitin Protein Ligase Activity                        | 1.000 | <i>RNF122</i> |

**Table S5. Enriched Kyoto Encyclopedia of Genes and Genomes (KEGG) pathways for the metritis complex in Jersey and Holstein dairy cattle.**

| Pathway ID <sup>12</sup> | Term                                                          | p-value | Gene(s) Assoc. <sup>13</sup> |
|--------------------------|---------------------------------------------------------------|---------|------------------------------|
| <b>bta04668</b>          | TNF Signaling Pathway                                         | 0.117   | <i>DAB2IP, TRAF3</i>         |
| <b>bta05161</b>          | Hepatitis B                                                   | 0.163   | <i>SLC10A1, TRAF3</i>        |
| <b>bta05168</b>          | Herpes Simplex Virus 1 Infection                              | 0.346   | <i>SRSF5, TRAF3</i>          |
| <b>bta04144</b>          | Endocytosis                                                   | 1.000   | <i>WIPF3</i>                 |
| <b>bta04064</b>          | NF-KappaB Signaling Pathway                                   | 1.000   | <i>TRAF3</i>                 |
| <b>bta05412</b>          | Arrhythmogenic Right Ventricular<br>Cardiomyopathy            | 1.000   | <i>SLC8A3</i>                |
| <b>bta05160</b>          | Hepatitis C                                                   | 1.000   | <i>TRAF3</i>                 |
| <b>bta04978</b>          | Mineral Absorption                                            | 1.000   | <i>SLC8A3</i>                |
| <b>bta04620</b>          | Toll-Like Receptor Signaling Pathway                          | 1.000   | <i>TRAF3</i>                 |
| <b>bta04714</b>          | Thermogenesis                                                 | 1.000   | <i>COX16</i>                 |
| <b>bta04260</b>          | Cardiac Muscle Contraction                                    | 1.000   | <i>SLC8A3</i>                |
| <b>bta04210</b>          | Apoptosis                                                     | 1.000   | <i>DAB2IP</i>                |
| <b>bta05165</b>          | Human Papillomavirus Infection                                | 1.000   | <i>TRAF3</i>                 |
| <b>bta04622</b>          | Rig-I-Like Receptor Signaling Pathway                         | 1.000   | <i>TRAF3</i>                 |
| <b>bta04020</b>          | Calcium Signaling Pathway                                     | 1.000   | <i>SLC8A3</i>                |
| <b>bta05162</b>          | Measles                                                       | 1.000   | <i>TRAF3</i>                 |
| <b>bta05200</b>          | Pathways In Cancer                                            | 1.000   | <i>TRAF3</i>                 |
| <b>bta04550</b>          | Signaling Pathways Regulating Plurip-<br>otency of Stem Cells | 1.000   | <i>ESRRB</i>                 |
| <b>bta04976</b>          | Bile Secretion                                                | 1.000   | <i>SLC10A1</i>               |
| <b>bta04621</b>          | Nod-Like Receptor Signaling Pathway                           | 1.000   | <i>TRAF3</i>                 |
| <b>bta04022</b>          | cGMP-Pkg Signaling Pathway                                    | 1.000   | <i>SLC8A3</i>                |
| <b>bta04740</b>          | Olfactory Transduction                                        | 1.000   | <i>SLC8A3</i>                |

<sup>12</sup> Pathway ID = KEGG Pathway Identification Number

<sup>13</sup> Gene(s) Assoc. = Genes linked to significant genetic variants in the metritis complex GWAS in-silico functional analysis

|                 |                                                           |       |                |
|-----------------|-----------------------------------------------------------|-------|----------------|
| <b>bta05164</b> | Influenza A                                               | 1.000 | <i>TRAF3</i>   |
| <b>bta04974</b> | Protein Digestion and Absorption                          | 1.000 | <i>SLC8A3</i>  |
| <b>bta04261</b> | Adrenergic Signaling in Cardiomyocytes                    | 1.000 | <i>SLC8A3</i>  |
| <b>bta04371</b> | Apelin Signaling Pathway                                  | 1.000 | <i>SLC8A3</i>  |
| <b>bta05171</b> | Coronavirus Disease - Covid-19                            | 1.000 | <i>TRAF3</i>   |
| <b>bta05222</b> | Small Cell Lung Cancer                                    | 1.000 | <i>TRAF3</i>   |
| <b>bta03040</b> | Spliceosome                                               | 1.000 | <i>SRSF5</i>   |
| <b>bta04150</b> | mTOR Signaling Pathway                                    | 1.000 | <i>DEPDC5</i>  |
| <b>bta05417</b> | Lipid and Atherosclerosis                                 | 1.000 | <i>TRAF3</i>   |
| <b>bta04657</b> | Il-17 Signaling Pathway                                   | 1.000 | <i>TRAF3</i>   |
| <b>bta05410</b> | Hypertrophic Cardiomyopathy                               | 1.000 | <i>SLC8A3</i>  |
| <b>bta05414</b> | Dilated Cardiomyopathy                                    | 1.000 | <i>SLC8A3</i>  |
| <b>bta05135</b> | Yersinia Infection                                        | 1.000 | <i>WIPF3</i>   |
| <b>bta04015</b> | Rap1 Signaling Pathway                                    | 1.000 | <i>SIPA1L1</i> |
| <b>bta05169</b> | Epstein-Barr Virus Infection                              | 1.000 | <i>TRAF3</i>   |
| <b>bta05203</b> | Viral Carcinogenesis                                      | 1.000 | <i>TRAF3</i>   |
| <b>bta04936</b> | Alcoholic Liver Disease                                   | 1.000 | <i>TRAF3</i>   |
| <b>bta04961</b> | Endocrine and Other Factor-Regulated Calcium Reabsorption | 1.000 | <i>SLC8A3</i>  |
| <b>bta05167</b> | Kaposi Sarcoma-Associated Herpesvirus Infection           | 1.000 | <i>TRAF3</i>   |
